# Supplementary material
Source: PubMed Central journal article supplement (PMC1759077)
Supplement: tobcont_12_1_74__1.pdf [file tobcont_12_1_74__1.pdf]

Questionnaire used in WMYTAU survey

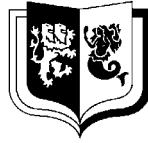

**THE UNIVERSITY  
OF BIRMINGHAM**

Please write your name here \_\_\_\_\_

**ANY INFORMATION YOU GIVE IS CONFIDENTIAL - NO-ONE AT SCHOOL OR HOME WILL SEE IT.**

**This is not a test, and we are interested in your honest answers only.**

**Answers should be marked as shown below. Please mark only one choice for each question.**

For most questions simply make a mark in the box next to the answer you choose, for some write in the open spaces. Most questions only need one mark or tick per question, **unless the question tells you to mark as many answers as apply to you.**

**Example 1:**

Which lesson do you like best?

- a) Biology
- b) Maths
- c) English
- d) History

e) Other (please state)  
.....French

**Example 2**

Which of these television soaps do you like best?

- a) Neighbours
- b) Coronation Street
- c) Eastenders
- d) Hollyoaks
- e) Brookside

---

**Section 1: About you**

1) Are you:

- a) Male
- b) Female

2) I am .....years old (please fill in)

3) Which of these ethnic groups describes you best (tick one)?

**a) White**

- a) British
- b) Irish

**c) Asian or Asian British**

- Indian
- Pakistani
- Any other Asian background  
(please say what

**e) Chinese**

- Chinese

**b) Mixed**

- White and black Caribbean
- White and black African
- White and Asian
- Any other mixed background

**d) Black or Black British**

- Caribbean
- African
- Any other Black background  
please say what

**f) Other ethnic group**

- Any other, Please say what

4) Who lives in your home? (Tick all that apply)

- a) My mum or step mum/female guardian
- b) My Dad or stepdad/ male guardian
- c) My older brother(s)
- d) My younger brother(s)
- e) My older sister(s)
- f) My younger sister(s)
- g) Somebody else

5) How much do you dislike or like school most of the time?

- a) I like school a lot
- b) I like school a little
- c) I do not like school
- d) I neither like it or dislike it

6) Have you missed one or more day's school without permission of your parents or the school in the last month?

- a) Yes
- b) No

7) Who is your favourite TV star? (If you haven't got one, write 'none')

.....

8) Who is your favourite film actor/actress? (If you haven't got one, write 'none')

.....

9) Who is your favourite band/singer/musician/rap artist? (If you haven't got one, write 'none')

.....

10) Does the female carer you live with smoke cigarettes?

- a) Yes
- b) No
- c) Don't know
- d) I don't live with a female carer

11) Does the male carer you live with smoke cigarettes?

- a) Yes
- b) No
- c) Don't know
- d) I don't live with a male carer

12) Do any of your brothers or sisters smoke cigarettes?

- a) Yes
- b) No
- c) Don't know

13) Does your best friend smoke cigarettes?

- a) Yes
- b) No
- c) Don't know

14) Do you have a mobile phone for your own use?

- a) Yes
- b) No - Go to question 20

15) Who paid for the phone?

- a) I did.
- b) Someone else did.

16) Who pays for the line rental and calls?

- a) I do
- b) It does not have line rental and call charges - it's pay as you go.
- c) Someone else does

**Section 2**

17) Which of these statements describes you best?

- a) I have **never** smoked *Go to section 3*
- b) I have only tried smoking **once or twice**
- c) I **used** to smoke, but I have given up now
- d) I **sometimes** smoke now, but I don't smoke as many as one a week
- e) I usually smoke **between one and six** cigarettes a week
- f) I usually smoke **more than six** cigarettes a week

  
  
  
  
  

18) How old were you when you had your first puff of a cigarette?

I was.....years old

19) Where do you / did you **usually** get your cigarettes from (tick one):

- a) I usually get/got my cigarettes from a shop.
- b) I usually get/got my cigarettes from another school pupil.
- c) I usually get/got my cigarettes from someone outside of school.
- d) I usually get/got my cigarettes from a machine

  
  
  

20) Do you usually buy your own cigarettes?

- a) Yes
- b) No *Go to question 27*

21) Where do you usually buy them?

- a) A shop
- b) Another school pupil   
*Go to question 23*
- c) Someone outside of school.
- d) A machine

e) Somewhere else (Please state)..... *Go to question 23*

22) Which shop do you usually buy them from (please write in the name of the shop. We will not tell anyone else this information, and we will not act on it - it is for our information only.)

.....

23) How many do you buy at a time?

I buy \_\_\_\_\_ cigarettes at a time

24) How much does it usually cost you to buy this many cigarettes?

\_\_\_\_\_

25) Where do you get the money to buy your cigarettes ?

- a) Pocket money
- b) Earnings/ wages
- c) Parent/guardian
- d) Dinner money
- e) Steal it

26) When you don't buy cigarettes, do you **usually** (tick only one):

- a) Just take them without people knowing?
- b) Borrow them and have to pay them back?
- c) Get given them without having to pay them back?

27) When you don't buy cigarettes, do you **usually** get them from (tick only one)

- a) Parent
- b) Brother or sister
- c) Friend

d) Other (please state).....

28) What brand do you usually smoke?

- a) Silk Cut
- b) Benson and Hedges
- c) Marlborough
- d) Marlborough lights
- e) Royals
- f) No brand in particular

g) Other (please state).....

29) If you usually smoke one brand, why do you smoke that one?

- a) Parent/carer smokes them
- b) Brother/sister smokes them
- c) Low tar
- d) Advertising
- e) Friend smokes them
- f) Nice taste

g) Famous person smokes them \_\_\_\_\_ (please state who).....

h) Other (please state).....

30) If you smoke, when do you smoke?

- a) Alone
- b) With friends
- c) When out socialising
- d) With family

### **Section 3**

The following section is about your friends. There is a side for each one. If you have one friend, please fill in the details on one of the following pages only. If you have two friends, fill in two pages. There are enough pages for information about up to six friends. If you have more than six friends fill in the pages for your six closest friends.

**This information is strictly confidential. No-one at school or home will be told what you write.**



32a) Name of first friend (first and last names)

---

32b) Are they?:

- a) Your best friend
- b) just a friend

32c) Are they:

- a) male
- b) female

32d) Are they:

- a) In your class?
- b) In your year?
- c) In another year at your school?
- d) At another school?
- e) Left school?

32e) Which of the following **best** describes them (tick one)

- a) Popular, cool, loud and fun?
- b) Sporty, popular, trendy?
- c) A troublemaker, rebel?
- d) Sometimes in trouble, doesn't like school?
- e) Quiet, friendly, nice, doing well at school
- f) Loners, prefers own company
- g) None of above

32f) Tick one box only:

- a) we go round together at school
- b) we see each other in school and out of school
- c) we just see each other out of school

32g) Tick one box only:

- a) we do activities together (sport, computers etc)
- b) we just hang about together, we don't do much
- c) we are close, talk a lot; share secrets
- d) we are like each other, think the same way

32h) Which of these applies to you:

- a) I buy cigarettes from this friend?
- b) I get cigarettes for free from this friend?
- c) I ask this friend to buy cigarettes for me from a shop?
- d) I don't get any cigarettes from this friend.

32i) Does this friend smoke?

- a) Yes.
- b) No
- c) Don't Know.

33a) Name of second friend (first and last names)

---

33b) Are they?:

- a) Your best friend
- b) just a friend

33c) Are they:

- a) male
- b) female

33d) Are they:

- a) In your class?
- b) In your year?
- c) In another year at your school?
- d) At another school?
- e) Left school?

33e) Which of the following **best** describes them (tick one)

- a) Popular, cool, loud and fun?
- b) Sporty, popular, trendy?
- c) A troublemaker, rebel?
- d) Sometimes in trouble, doesn't like school?
- e) Quiet, friendly, nice, doing well at school
- f) Loners, prefers own company
- g) None of above

33f) Tick one box only:

- a) we go round together at school
- b) we see each other in school and out of school
- c) we just see each other out of school

33g) Tick one box only:

- a) we do activities together (sport, computers etc)
- b) we just hang about together, we don't do much
- c) we are close, talk a lot; share secrets
- d) we are like each other, think the same way

33h) Which of these applies to you:

- a) I buy cigarettes from this friend?
- b) I get cigarettes for free from this friend?
- c) I ask this friend to buy cigarettes for me from a shop?
- d) I don't get any cigarettes from this friend.

33i) Does this friend smoke?

- a) Yes.
- b) No
- c) Don't Know.

34a) Name of third friend (first and last names)

---

34b) Are they?:

- a) Your best friend
- b) just a friend

34c) Are they:

- a) male
- b) female

34d) Are they:

- a) In your class?
- b) In your year?
- c) In another year at your school?
- d) At another school?
- e) Left school?

34e) Which of the following **best** describes them (tick one)

- a) Popular, cool, loud and fun?
- b) Sporty, popular, trendy?
- c) A troublemaker, rebel?
- d) Sometimes in trouble, doesn't like school?
- e) Quiet, friendly, nice, doing well at school
- f) Loners, prefers own company
- g) None of above

34f) Tick one box only:

- a) we go round together at school
- b) we see each other in school and out of school
- c) we just see each other out of school

34g) Tick one box only:

- a) we do activities together (sport, computers etc)
- b) we just hang about together, we don't do much
- c) we are close, talk a lot; share secrets
- d) we are like each other, think the same way

34h) Which of these applies to you:

- a) I buy cigarettes from this friend?
- b) I get cigarettes for free from this friend?
- c) I ask this friend to buy cigarettes for me from a shop?
- d) I don't get any cigarettes from this friend.

34i) Does this friend smoke?

- a) Yes.
- b) No
- c) Don't Know.

35a) Name of fourth friend (first and last names)

---

35b) Are they?:

- a) Your best friend
- b) just a friend

35c) Are they:

- a) male
- b) female

35d) Are they:

- a) In your class?
- b) In your year?
- c) In another year at your school?
- d) At another school?
- e) Left school?

35e) Which of the following **best** describes them (tick one)

- a) Popular, cool, loud and fun?
- b) Sporty, popular, trendy?
- c) A troublemaker, rebel?
- d) Sometimes in trouble, doesn't like school?
- e) Quiet, friendly, nice, doing well at school
- f) Loners, prefers own company
- g) None of above

35f) Tick one box only:

- a) we go round together at school
- b) we see each other in school and out of school
- c) we just see each other out of school

35g) Tick one box only:

- a) we do activities together (sport, computers etc)
- b) we just hang about together, we don't do much
- c) we are close, talk a lot; share secrets
- d) we are like each other, think the same way

35h) Which of these applies to you:

- a) I buy cigarettes from this friend?
- b) I get cigarettes for free from this friend?
- c) I ask this friend to buy cigarettes for me from a shop?
- d) I don't get any cigarettes from this friend.

35i) Does this friend smoke?

- a) Yes.
- b) No
- c) Don't Know.



36a) Name of fifth friend (first and last names)

---

36b) Are they?:

- a) Your best friend
- b) just a friend

36c) Are they:

- a) male
- b) female

36d) Are they:

- a) In your class?
- b) In your year?
- c) In another year at your school?
- d) At another school?
- e) Left school?

36e) Which of the following **best** describes them (tick one)

- a) Popular, cool, loud and fun?
- b) Sporty, popular, trendy?
- c) A troublemaker, rebel?
- d) Sometimes in trouble, doesn't like school?
- e) Quiet, friendly, nice, doing well at school
- f) Loners, prefers own company
- g) None of above

36f) Tick one box only:

- a) we go round together at school
- b) we see each other in school and out of school
- c) we just see each other out of school

36g) Tick one box only:

- a) we do activities together (sport, computers etc)
- b) we just hang about together, we don't do much
- c) we are close, talk a lot; share secrets
- d) we are like each other, think the same way

36h) Which of these applies to you:

- a) I buy cigarettes from this friend?
- b) I get cigarettes for free from this friend?
- c) I ask this friend to buy cigarettes for me from a shop?
- d) I don't get any cigarettes from this friend.

36i) Does this friend smoke?

- a) Yes.
- b) No
- c) Don't Know.

37a) Name of sixth friend (first and last names)

---

37b) Are they?:

- a) Your best friend
- b) just a friend

37c) Are they:

- a) male
- b) female

37d) Are they:

- a) In your class?
- b) In your year?
- c) In another year at your school?
- d) At another school?
- e) Left school?

37e) Which of the following **best** describes them (tick one)

- a) Popular, cool, loud and fun?
- b) Sporty, popular, trendy?
- c) A troublemaker, rebel?
- d) Sometimes in trouble, doesn't like school?
- e) Quiet, friendly, nice, doing well at school
- f) Loners, prefers own company
- g) None of above

37f) Tick one box only:

- a) we go round together at school
- b) we see each other in school and out of school
- c) we just see each other out of school

37g) Tick one box only:

- a) we do activities together (sport, computers etc)
- b) we just hang about together, we don't do much
- c) we are close, talk a lot; share secrets
- d) we are like each other, think the same way

37h) Which of these applies to you:

- a) I buy cigarettes from this friend?
- b) I get cigarettes for free from this friend?
- c) I ask this friend to buy cigarettes for me from a shop?
- d) I don't get any cigarettes from this friend.

37i) Does this friend smoke?

- a) Yes.
- b) No
- c) Don't Know.

## **Delivery of questionnaire protocol WMYTAU survey**

### **Delivery of questionnaires**

#### **Protocol**

Hello, my name is..... I am from the University of Birmingham research team. In front of you, you should have a questionnaire. Please fill it in pencil. If anyone hasn't got a pencil or a questionnaire, please raise your hand now. Please use a rubber to correct mistakes.

The questionnaire in front of you asks for information about you and your friends, so that we can learn how best to help young people in the future.

Please write your name (first and surnames) on the front now. Everything you write is confidential and no-one will know what you have written outside of the research team. However, we do need to know the names of you and your friends so that the computer can work out who you are friends with. Apart from when you write your name and the names of your friends, once the information is in the computer, names will not be used again.

At the back of the questionnaire are 6 sides of paper with questions about your friends. Please fill in 1 side for each of your friends. If you have 3 friends fill in 3 sides. If you have more than 6 good friends, fill in the 6 pages for the 6 most important to you.

No teachers, parents or friends will be told what you have written but it is very important that your names are on the paper and that you fill them in honestly.

If you have any problems, please raise your hand and I will come to you.

Please do the questionnaire in silence as then we can be sure that we are finding out what you think and not what your friend thinks!

When you have finished, please raise your hand.

Thank you.

#### Pilot study and test retest reliability WMYTAU survey

The resulting draft of the questionnaire was then administered to pupils in Years 9 and 10 in the same school in the village from which the participants for the focus groups were recruited. This school had 21-30% of pupils eligible for free school meals, the mode in Birmingham. Two non-streamed classes were randomly selected and parents and pupils were offered the opportunity to decline participation, but none did so. The school nurse and the researcher attended. After pupils had completed the questionnaire, the researcher facilitated a whole class discussion. As a result, several changes to the wording and grammar of the questionnaire were made. However, most pupils felt that the questionnaire was comprehensible and easy to complete.

Two further randomly selected Year 9 and 10 classes were drawn from the same school to examine the test-retest reliability of the questionnaire. Questionnaires were administered to these groups once and then three weeks later. The responses to the questionnaires were compared. Of all those who reported accessing cigarettes in some way from a named friend 67% (6/9) reported the same access at time point two. The knowledge of friends smoking behaviour was assessed by asking, for each named friend, whether or not they smoked. 83% of respondents naming the same friends gave the same statement of their smoking behaviour (yes/no/don't know). Overall, the questionnaire showed a 'good level' of test retest reliability<sup>53</sup>. (See table 1 below).

---

Number of friends mentioned at both time points.

|                                                                  | Number | Percentage |
|------------------------------------------------------------------|--------|------------|
|                                                                  | r      | e          |
|                                                                  | /total | Of total   |
| At least one                                                     | 31/34  | 91%        |
| At least two                                                     | 27/34  | 79%        |
| At least three                                                   | 20/34  | 59%        |
| At least four                                                    | 16/34  | 47%        |
| At least five                                                    | 12/34  | 35%        |
| At least six                                                     | 4/34   | 12%        |
| 100% disagreement (no friends reported same at both time points) | 3/34   | 9%         |
| 100% agreement (all friends reported same at both time points)   | 13/34  | 38%        |

---

*Table 1: numbers of same friends mentioned at time points 1 and 2 in the test retest exercise*



Interview schedule WMYTAU survey

**Everything that is said in this room is confidential- no-one will be told anything that you say.**

Do you smoke?

Do your friends?

How many people in your class smoke?

Where do you (if smoker) people (if non smoker) in school get cigarettes from ?

How do you/they know where to get them from ?

If you/they get them from people in school where do the people that they get them from get them from ?

Where does your/the money come from ?

Do you/people smoke in school / on the school premises ?

Who do you/they smoke with ?

Anything else important?

## Musical categories assessed by youths in WMYTAU survey

1= punk/rebel

0=square

|                           |   |
|---------------------------|---|
| 2pac                      | 1 |
| a1                        | 0 |
| aaliya                    | 0 |
| allsaints                 | 0 |
| anything                  | 0 |
| artful dodger             | 1 |
| atb                       | 1 |
| backstreet boys           | 0 |
| bally jagpal              | 0 |
| big                       | 0 |
| biggie small              | 1 |
| blink 182                 | 1 |
| blur                      | 0 |
| bob the builder           | 0 |
| britney spears            | 0 |
| bryon adams,savage garden | 0 |
| bt                        | 0 |
| Buster Rhymes             | 1 |
| Carl Cox                  | 1 |
| cash money productions    | 1 |
| coldplay                  | 0 |
| counting crows            | 0 |
| craid david               | 0 |
| darude                    | 1 |
| david gray                | 0 |
| delicious                 | 0 |
| destiny' child            | 0 |
| dido                      | 0 |
| dido                      |   |
| dmx                       | 1 |

|                        |   |
|------------------------|---|
| dr dre                 | 1 |
| druhill                | 0 |
| drums                  | 1 |
| eiffel 65              | 0 |
| eminem                 | 1 |
| eminem                 |   |
| five                   | 0 |
|                        |   |
| frederic chopin        | 0 |
|                        |   |
| garage music           | 1 |
| gomez                  | 0 |
| green day              | 0 |
|                        |   |
| Hard Dance             | 1 |
| hear-say               | 0 |
|                        |   |
| in sane clown posse    | 1 |
|                        |   |
| INDIAN MUSIC           | 0 |
| Ja Rule                | 1 |
|                        |   |
| jenifer lopez          | 0 |
| JJ72                   | 0 |
|                        |   |
| judge jules            | 1 |
| J-Z                    | 1 |
| kci,jojo               | 1 |
| Ked Rock               | 1 |
|                        |   |
| Kelly Price & Mercedes | 1 |
| lauren hill            | 0 |
|                        |   |
| leann rimes            | 0 |
|                        |   |
| Led Zeppelin           | 0 |
|                        |   |
| limp bizkit            | 1 |
|                        |   |
| madison avenue         | 0 |
| madonna                | 0 |
|                        |   |
| mariah cairy           | 0 |
|                        |   |
| marilyn manson         | 1 |
| mase                   | 1 |
|                        |   |
| mauro picotto(dj)      | 1 |
| metallica              | 1 |

|                        |   |
|------------------------|---|
| method man             | 1 |
| moby                   | 0 |
| muse                   | 0 |
| nas                    | 1 |
| nirvana                | 1 |
| nsync                  | 0 |
|                        |   |
| ocean colour scene     | 0 |
| offspring              | 1 |
| pink                   | 1 |
| r.e.m.                 | 0 |
|                        |   |
| rachel stevens         | 0 |
| radiohead              | 0 |
|                        |   |
| red hot chilli peppers | 1 |
|                        |   |
| right said fred        | 0 |
|                        |   |
| robbie williams        | 0 |
| s club 7               | 0 |
| sangeet                | 0 |
|                        |   |
| savage garden          | 0 |
|                        |   |
| shehzad roy            | 0 |
| sisqo                  | 1 |
|                        |   |
| snoop doggy            | 1 |
|                        |   |
| so solid crew          | 1 |
| spooks                 | 1 |
| steps                  | 0 |
|                        |   |
| stereophonics          | 0 |
|                        |   |
| Sugarbabes             | 0 |
| texas                  | 0 |
|                        |   |
| the beatles            | 0 |
| the corr's             | 0 |
|                        |   |
| the dum dums           | 1 |
|                        |   |
| the offspring          | 1 |
|                        |   |
| toalcracker            | 1 |
| travis                 | 0 |
| tupac                  | 1 |

|              |   |
|--------------|---|
| u2           | 0 |
| ub40         | 0 |
| west life    | 0 |
| wheatus      | 1 |
| Will Smith   | 0 |
| Wu-Tang Clan | 1 |
